# Supplementary material for: Spatial Structure of Tumor and Immune Cells Shape Outcomes in ER⁺HER2⁻ and Triple-Negative Breast Cancer
Source: Research Square preprint supplement (doi:10.21203/rs.3.rs-8548859/v1), 2026-02-10
Supplement: Supplementary file 1 [file 62b896959e597d564b58164d.docx]

**Supplementary Table 1.** Comparison of baseline clinical and pathological characteristics between patients with available and evaluable FFPE tumor material (n = 1370) and those without suitable archival FFPE material (n = 1051). Among the 1481 tumor samples retrieved, 1370 were deemed representative and included in the analysis. Categorical variables were compared using Pearson’s chi-squared test, while continuous variables were assessed using the Kruskal–Wallis rank sum test. Values are presented as counts and percentages unless otherwise indicated.

#####

| **Characteristic** | **No FFPE (N = 1051)** | **FFPE Available (N = 1370)** | **p-value** |
| --- | --- | --- | --- |
| **ER status** |  |  | 0.001 |
| Negative | 192 (18.3%) | 326 (23.8%) |  |
| Positive | 855 (81.7%) | 1043 (76.2%) |  |
| **Age (years)** |  |  | 0.023 |
| Median (IQR) | 44.0 (40.0–47.5) | 45.0 (41.0–48.0) |  |
| **Nodal status** |  |  | 0.775 |
| N0 | 736 (70.6%) | 958 (70.0%) |  |
| N+ | 307 (29.4%) | 410 (30.0%) |  |
| **Menopausal status** |  |  | 0.002 |
| Pre | 895 (87.4%) | 1213 (91.4%) |  |
| Post | 129 (12.6%) | 114 (8.6%) |  |
| **Breast cancer subtype** |  |  | 0.743 |
| ER⁺HER2⁻ | 266 (67.7%) | 797 (66.3%) |  |
| HER2⁺ | 48 (12.2%) | 165 (13.7%) |  |
| TNBC | 79 (20.1%) | 240 (20.0%) |  |
| **Tumor size** |  |  | 0.004 |
| T1 | 781 (75.1%) | 953 (69.8%) |  |
| T2–3 | 259 (24.9%) | 413 (30.2%) |  |
| **Histological subtype** |  |  | 0.679 |
| NST | 10 (90.9%) | 1252 (91.4%) |  |
| Lobular | 1 (9.1%) | 68 (5.0%) |  |
| Other | 0 (0.0%) | 50 (3.6%) |  |
| **Metastatic progression** |  |  | 0.002 |
| No | 997 (94.9%) | 1256 (91.7%) |  |
| Yes | 54 (5.1%) | 114 (8.3%) |  |

**Abbreviations:** FFPE, Formalin-Fixed Paraffin-Embedded; ER, Estrogen Receptor; IQR, Interquartile Range; HER2, Human Epidermal Growth Factor Receptor 2; TNBC, Triple-Negative Breast Cancer; NST, No Special Type; T1, T2–3, Tumor size categories (TNM classification).

**Supplementary Table 2.** Per-facet Kruskal–Wallis tests of immune metrics across clinicopathologic categories, stratified by subtype (ER⁺/HER2⁻ and TNBC). Each row reports one outcome—stromal TILs (sTILs, %), intratumoral TIL score (iTIL, unitless), lymphocyte→tumor and tumor→lymphocyte nearest-neighbor distances (L→T, T→L, µm), and tumor–lymphocyte KL divergence (unitless)—tested across levels of a feature (e.g., grade, central sclerosis, nodal status, LVI, necrosis, in-situ component). Columns show the number of groups compared (k_groups), total N analyzed (N_total), the Kruskal–Wallis p-value (KW p), and a compact breakdown of N per category used in the test. Only facets with ≥2 categories and non-constant outcome were tested; categories labeled “NA” were excluded. P-values are two-sided and not adjusted across facets. Units: distances in µm; KL is dimensionless; sTILs in %.

| **Group** | **Feature** | **Outcome** | **k_groups** | **N_total** | **KW p** | **N per category** |
| --- | --- | --- | --- | --- | --- | --- |
| ER+/HER2- | Any Necrosis | Distance lymphocyte→tumor | 2 | 792 | 0.078 | Absent=518; Present=274 |
| ER+/HER2- | Central Sclerosis | Distance lymphocyte→tumor | 2 | 792 | 0.401 | Absent=476; Present=316 |
| ER+/HER2- | Grade Tumor | Distance lymphocyte→tumor | 3 | 792 | <0.001 | 1=177; 2=429; 3=186 |
| ER+/HER2- | In_situ | Distance lymphocyte→tumor | 2 | 788 | 0.464 | No=337; Yes=451 |
| ER+/HER2- | Lymphovascular invasion dich | Distance lymphocyte→tumor | 2 | 792 | 0.607 | Absent=712; Present=80 |
| ER+/HER2- | Nodal_status | Distance lymphocyte→tumor | 2 | 177 | 0.256 | N+=81; N0=96 |
| TNBC | Any Necrosis | Distance lymphocyte→tumor | 2 | 235 | 0.707 | Absent=60; Present=175 |
| TNBC | Central Sclerosis | Distance lymphocyte→tumor | 2 | 235 | 0.957 | Absent=126; Present=109 |
| TNBC | Grade Tumor | Distance lymphocyte→tumor | 3 | 235 | 0.085 | 1=6; 2=45; 3=184 |
| TNBC | In_situ | Distance lymphocyte→tumor | 2 | 231 | 0.437 | No=163; Yes=68 |
| TNBC | Lymphovascular invasion dich | Distance lymphocyte→tumor | 2 | 234 | 0.942 | Absent=215; Present=19 |
| ER+/HER2- | Any Necrosis | Distance tumor→lymphocyte | 2 | 792 | 0.442 | Absent=518; Present=274 |
| ER+/HER2- | Central Sclerosis | Distance tumor→lymphocyte | 2 | 792 | 0.026 | Absent=476; Present=316 |
| ER+/HER2- | Grade Tumor | Distance tumor→lymphocyte | 3 | 792 | <0.001 | 1=177; 2=429; 3=186 |
| ER+/HER2- | In_situ | Distance tumor→lymphocyte | 2 | 788 | 0.216 | No=337; Yes=451 |
| ER+/HER2- | Lymphovascular invasion dich | Distance tumor→lymphocyte | 2 | 792 | 0.740 | Absent=712; Present=80 |
| ER+/HER2- | Nodal_status | Distance tumor→lymphocyte | 2 | 177 | 0.047 | N+=81; N0=96 |
| TNBC | Any Necrosis | Distance tumor→lymphocyte | 2 | 235 | 0.895 | Absent=60; Present=175 |
| TNBC | Central Sclerosis | Distance tumor→lymphocyte | 2 | 235 | 0.069 | Absent=126; Present=109 |
| TNBC | Grade Tumor | Distance tumor→lymphocyte | 3 | 235 | 0.073 | 1=6; 2=45; 3=184 |
| TNBC | In_situ | Distance tumor→lymphocyte | 2 | 231 | <0.001 | No=163; Yes=68 |
| TNBC | Lymphovascular invasion dich | Distance tumor→lymphocyte | 2 | 234 | 0.363 | Absent=215; Present=19 |
| TNBC | Nodal_status | Distance tumor→lymphocyte | 2 | 90 | 0.052 | N+=21; N0=69 |
| ER+/HER2- | Any Necrosis | iTIL | 2 | 792 | 0.111 | Absent=518; Present=274 |
| ER+/HER2- | Central Sclerosis | iTIL | 2 | 792 | <0.001 | Absent=476; Present=316 |
| ER+/HER2- | Grade Tumor | iTIL | 3 | 792 | 0.009 | 1=177; 2=429; 3=186 |
| ER+/HER2- | In_situ | iTIL | 2 | 788 | 0.765 | No=337; Yes=451 |
| ER+/HER2- | Lymphovascular invasion dich | iTIL | 2 | 792 | 0.257 | Absent=712; Present=80 |
| ER+/HER2- | Nodal_status | iTIL | 2 | 177 | 0.044 | N+=81; N0=96 |
| TNBC | Any Necrosis | iTIL | 2 | 235 | 0.733 | Absent=60; Present=175 |
| TNBC | Central Sclerosis | iTIL | 2 | 235 | 0.507 | Absent=126; Present=109 |
| TNBC | Grade Tumor | iTIL | 3 | 235 | 0.675 | 1=6; 2=45; 3=184 |
| TNBC | In_situ | iTIL | 2 | 231 | 0.133 | No=163; Yes=68 |
| TNBC | Lymphovascular invasion dich | iTIL | 2 | 234 | 0.869 | Absent=215; Present=19 |
| TNBC | Nodal_status | iTIL | 2 | 90 | 0.973 | N+=21; N0=69 |
| ER+/HER2- | Any Necrosis | KL divergence tumor to lymphocyte | 2 | 792 | 0.085 | Absent=518; Present=274 |
| ER+/HER2- | Central Sclerosis | KL divergence tumor to lymphocyte | 2 | 792 | <0.001 | Absent=476; Present=316 |
| ER+/HER2- | Grade Tumor | KL divergence tumor to lymphocyte | 3 | 792 | 0.004 | 1=177; 2=429; 3=186 |
| ER+/HER2- | In_situ | KL divergence tumor to lymphocyte | 2 | 788 | 0.551 | No=337; Yes=451 |
| ER+/HER2- | Lymphovascular invasion dich | KL divergence tumor to lymphocyte | 2 | 792 | 0.277 | Absent=712; Present=80 |
| ER+/HER2- | Nodal_status | KL divergence tumor to lymphocyte | 2 | 177 | 0.032 | N+=81; N0=96 |
| TNBC | Any Necrosis | KL divergence tumor to lymphocyte | 2 | 235 | 0.766 | Absent=60; Present=175 |
| TNBC | Central Sclerosis | KL divergence tumor to lymphocyte | 2 | 235 | 0.437 | Absent=126; Present=109 |
| TNBC | Grade Tumor | KL divergence tumor to lymphocyte | 3 | 235 | 0.587 | 1=6; 2=45; 3=184 |
| TNBC | In_situ | KL divergence tumor to lymphocyte | 2 | 231 | 0.193 | No=163; Yes=68 |
| TNBC | Lymphovascular invasion dich | KL divergence tumor to lymphocyte | 2 | 234 | 0.942 | Absent=215; Present=19 |
| TNBC | Nodal_status | KL divergence tumor to lymphocyte | 2 | 90 | 0.596 | N+=21; N0=69 |
| ER+/HER2- | Any Necrosis | sTILs | 2 | 791 | <0.001 | Absent=518; Present=273 |
| ER+/HER2- | Central Sclerosis | sTILs | 2 | 791 | <0.001 | Absent=475; Present=316 |
| ER+/HER2- | Grade Tumor | sTILs | 3 | 791 | <0.001 | 1=177; 2=428; 3=186 |
| ER+/HER2- | In_situ | sTILs | 2 | 787 | 0.087 | No=337; Yes=450 |
| ER+/HER2- | Lymphovascular invasion dich | sTILs | 2 | 791 | 0.267 | Absent=711; Present=80 |
| ER+/HER2- | Nodal_status | sTILs | 2 | 177 | 0.097 | N+=81; N0=96 |
| TNBC | Any Necrosis | sTILs | 2 | 233 | 0.194 | Absent=60; Present=173 |
| TNBC | Central Sclerosis | sTILs | 2 | 233 | 0.135 | Absent=124; Present=109 |
| TNBC | Grade Tumor | sTILs | 3 | 233 | 0.001 | 1=6; 2=45; 3=182 |
| TNBC | In_situ | sTILs | 2 | 231 | 0.002 | No=163; Yes=68 |
| TNBC | Lymphovascular invasion dich | sTILs | 2 | 232 | 0.003 | Absent=213; Present=19 |
| TNBC | Nodal_status | sTILs | 2 | 88 | 0.427 | N+=21; N0=67 |

**Supplementary Table 3.** Significant pairwise Wilcoxon comparisons (BH-adjusted) within each facet and subtype. For each outcome (sTILs, iTIL, KL divergence, L→T, T→L) and feature, the table lists the Contrast (second level vs first level), sample sizes (n1, n2) and medians (med1, med2) for the two levels, the BH-adjusted p-value (Adj p-value), the Direction arrow (↑ if median₂>median₁, ↓ if median₂<median₁), and the Median diff (median₂ − median₁) with Units (µm for distances; unitless for KL and iTIL; % for sTILs). Only comparisons with FDR<0.05 are shown. Facets were included only if the outcome varied and each compared category had ≥5 observations; categories labeled “NA” and nodal micro-metastasis were excluded. Interpretation notes: higher KL indicates greater tumor–lymphocyte separation; shorter distances indicate closer spatial proximity.

| **Group** | **Feature** | **Outcome** | **Contrast** | **n1** | **n2** | **med1** | **med2** | **Adj p-value** | **Direction** | **Median diff** | **Units** |
| --- | --- | --- | --- | --- | --- | --- | --- | --- | --- | --- | --- |
| ER+/HER2- | Grade Tumor | d_lymphocyte_to_tumor | 1 vs 2 | 429 | 177 | 189.771 | 217.183 | <0.001 | ↑ | 27.412 | (µm) |
| ER+/HER2- | Grade Tumor | d_lymphocyte_to_tumor | 1 vs 3 | 186 | 177 | 154.447 | 217.183 | <0.001 | ↑ | 62.737 | (µm) |
| ER+/HER2- | Grade Tumor | d_lymphocyte_to_tumor | 2 vs 3 | 186 | 429 | 154.447 | 189.771 | <0.001 | ↑ | 35.324 | (µm) |
| ER+/HER2- | Central Sclerosis | d_tumor_to_lymphocyte | Absent vs Present | 316 | 476 | 75.221 | 78.852 | 0.026 | ↑ | 3.632 | (µm) |
| ER+/HER2- | Grade Tumor | d_tumor_to_lymphocyte | 1 vs 2 | 429 | 177 | 77.269 | 84.247 | <0.001 | ↑ | 6.978 | (µm) |
| ER+/HER2- | Grade Tumor | d_tumor_to_lymphocyte | 1 vs 3 | 186 | 177 | 71.883 | 84.247 | <0.001 | ↑ | 12.365 | (µm) |
| ER+/HER2- | Grade Tumor | d_tumor_to_lymphocyte | 2 vs 3 | 186 | 429 | 71.883 | 77.269 | 0.012 | ↑ | 5.386 | (µm) |
| ER+/HER2- | Nodal_status | d_tumor_to_lymphocyte | N+ vs N0 | 96 | 81 | 74.354 | 79.393 | 0.047 | ↑ | 5.040 | (µm) |
| TNBC | In_situ | d_tumor_to_lymphocyte | No vs Yes | 68 | 163 | 74.821 | 62.662 | <0.001 | ↓ | -12.160 | (µm) |
| ER+/HER2- | Central Sclerosis | itil | Absent vs Present | 316 | 476 | 0.092 | 0.020 | <0.001 | ↓ | -0.073 | (score) |
| ER+/HER2- | Grade Tumor | itil | 1 vs 2 | 429 | 177 | 0.072 | -0.004 | 0.007 | ↓ | -0.076 | (score) |
| ER+/HER2- | Grade Tumor | itil | 1 vs 3 | 186 | 177 | 0.054 | -0.004 | 0.043 | ↓ | -0.058 | (score) |
| ER+/HER2- | Nodal_status | itil | N+ vs N0 | 96 | 81 | 0.152 | 0.048 | 0.044 | ↓ | -0.104 | (score) |
| ER+/HER2- | Central Sclerosis | kl_tl | Absent vs Present | 316 | 476 | 0.806 | 0.886 | <0.001 | ↑ | 0.080 | (unitless) |
| ER+/HER2- | Grade Tumor | kl_tl | 1 vs 2 | 429 | 177 | 0.835 | 0.912 | 0.003 | ↑ | 0.078 | (unitless) |
| ER+/HER2- | Grade Tumor | kl_tl | 1 vs 3 | 186 | 177 | 0.854 | 0.912 | 0.033 | ↑ | 0.058 | (unitless) |
| ER+/HER2- | Nodal_status | kl_tl | N+ vs N0 | 96 | 81 | 0.719 | 0.851 | 0.032 | ↑ | 0.132 | (unitless) |
| ER+/HER2- | Any Necrosis | sTILs | Absent vs Present | 273 | 518 | 1.000 | 0.500 | <0.001 | ↓ | -5.00 | % |
| ER+/HER2- | Central Sclerosis | sTILs | Absent vs Present | 316 | 475 | 1.000 | 0.500 | <0.001 | ↓ | -5.00 | % |
| ER+/HER2- | Grade Tumor | sTILs | 1 vs 3 | 186 | 177 | 1.000 | 0.500 | <0.001 | ↓ | -5.00 | % |
| ER+/HER2- | Grade Tumor | sTILs | 2 vs 3 | 186 | 428 | 1.000 | 0.500 | <0.001 | ↓ | -5.00 | % |
| TNBC | Grade Tumor | sTILs | 1 vs 3 | 182 | 6 | 3.000 | 0.750 | 0.012 | ↓ | -22.50 | % |
| TNBC | Grade Tumor | sTILs | 2 vs 3 | 182 | 45 | 3.000 | 2.000 | 0.024 | ↓ | -10.00 | % |
| TNBC | In_situ | sTILs | No vs Yes | 68 | 163 | 1.750 | 3.000 | 0.002 | ↑ | 12.50 | % |
| TNBC | Lymphovascular invasion dich | sTILs | Absent vs Present | 19 | 213 | 1.000 | 3.000 | 0.003 | ↑ | 20.00 | % |

**Supplementary Table 4. Significant architecture-immune associations in grade-stratified ER⁺/HER2⁻ disease**

(BH-adjusted pairwise Wilcoxon tests within each facet; only FDR < 0.05 shown)

| **Feature** | **Outcome** | **Contrast** | **Adj p-value** |
| --- | --- | --- | --- |
| **Grade 1-2** |  |  |  |
| **Grade Tumor** | Lymphocyte→Tumor distance | 2 vs 1 | **<0.001** |
|  | Tumor→Lymphocyte distance | 2 vs 1 | **<0.001** |
|  | iTIL | 2 vs 1 | **0.002** |
|  | KL divergence | 2 vs 1 | **<0.001** |
| **Central Sclerosis** | Tumor→Lymphocyte distance | Present vs Absent | **0.023** |
|  | iTIL | Present vs Absent | **<0.001** |
|  | KL divergence | Present vs Absent | **<0.001** |
|  | sTILs | Present vs Absent | **<0.001** |
| **Nodal status** | Tumor→Lymphocyte distance | N0 vs N+ | **0.048** |
|  | KL divergence | N0 vs N+ | **0.039** |
| **Any Necrosis** | sTILs | Present vs Absent | **<0.001** |
| **In-situ** | sTILs | Yes vs No | **0.044** |
| **Grade 3** |  |  |  |
| **Lymphovascular invasion** | iTIL | Present vs Absent | **0.024** |
|  | KL divergence | Present vs Absent | **0.022** |
| **Any Necrosis** | sTILs | Present vs Absent | **<0.001** |
|  |  |  |  |

*Abbreviations:* iTIL, intratumoral TIL score (unitless); sTILs, stromal TILs (%); KL, tumor–lymphocyte KL divergence (unitless). Distances are nearest-neighbor in µm.
